# Supplementary material for: Moving Evolution Education Forward: A Systematic Analysis of Literature to Identify Gaps in Collective Knowledge for Teaching
Source: Atypon-hosted journal article supplement (doi:10.1187/cbe.17-08-0190), 2018-02-08
Supplement: combinedsupmats.pdf [file combinedsupmats.pdf]

# Supplemental Material

*CBE—Life Sciences Education*

Ziadie and Andrews

## SUPPLEMENTAL MATERIALS

**Table S1. Exact terms used in Boolean search in ERIC database. Shortened words (e.g. Lab) and abbreviations (e.g. PCK) allow for a more inclusive search.**

| <b>Evolution topic</b> | <b>Teaching and learning</b>  | <b>Study population</b> |
|------------------------|-------------------------------|-------------------------|
| Natural selection      | Student learning              | K-12                    |
| Genetic drift          | Student thinking              | High school             |
| Gene flow              | Misconception                 | Primary                 |
| Evolutionary tree      | Naïve conception              | Secondary               |
| Phylogenetic tree      | Case study                    | Post-secondary          |
| Phylogenetics          | Active learning               | College                 |
| Macroevolution         | Instruction                   | Undergraduate           |
| Evo-Devo               | Prior knowledge               | University              |
| Speciation             | Teaching strategy             | Higher education        |
| Sexual selection       | Pedagogical content knowledge | Graduate                |
| Human evolution        | PCK                           | Instructor              |
| Molecular evolution    | Pedagogy                      | Teacher                 |
| Kin selection          | Subject matter knowledge      | Faculty                 |
| Plasticity             | SMK                           | Professor               |
| Gene by environment    | Threshold concept             |                         |
| Hardy Weinberg         | Lesson                        |                         |
| Population genetics    | Activity                      |                         |
| Dominance              | Exercise                      |                         |
| Allele                 | Lab                           |                         |
| Lamarck                |                               |                         |
| Tree thinking          |                               |                         |
| Adaptation             |                               |                         |
| Genome                 |                               |                         |
| Variation              |                               |                         |
| Heritability           |                               |                         |
| Artificial selection   |                               |                         |

## **Directions for using the Collective PCK for Undergraduate and High School Evolution Education Database**

We have made the database generated by this research available as a resource for education researchers and instructors. This database is stored in two Excel worksheets, one for work that includes undergraduates and one for work on high school students. You can open it using a free program like Google Sheets if you do not have access to Excel.

Both worksheets are formatted the same way. Each line of the worksheet corresponds to one paper and lists the full APA citation, journal title, publication year, PCK component(s), type of work, and evolution topic(s). Some evolution topics are organized into overarching categories, as shown in Table 2. Overarching categories are indicated using all caps for column titles.

You can use the “Sort” function in Excel to find papers of interest to you. For example, imagine you want to learn about student thinking related to tree-thinking. Select the full data set by selecting the cell in the uppermost left. Select the dropdown list “Data,” then select “Sort.” This opens a box. Make sure “My list has headers” is selected. Sort first by the Column titled “Tree-thinking” and then the column titled “Student thinking.” The rows will rearrange and the those at the top will be papers describing undergraduate’s thinking about tree-thinking. You can use the journal, publication year, and type to give you more information about the paper to determine if it meets your needs.
